# U-shaped Relationship Between Body Mass Index and Intracerebral Hemorrhage-Related Functional Decline

**Short title:** BMI and Stroke-related Disability of ICH

Yuji Kanejima, PT, PhD<sup>1,2</sup>; Masato Ogawa, PT, PhD<sup>1,3,8</sup>; Kodai Ishihara, PT, PhD<sup>1,4</sup>;  
Naofumi Yoshida, MD, PhD<sup>5,7</sup>; Michikazu Nakai, PhD<sup>6,7</sup>; Koshiro Kanaoka, MD, PhD<sup>7</sup>;  
Yoko Sumita, MD, PhD<sup>7</sup>; Takuo Emoto, MD, PhD<sup>5</sup>; Yoshitada Sakai, MD, PhD<sup>8</sup>;  
Yoshitaka Iwanaga, MD, PhD<sup>7</sup>; Yoshihiro Miyamoto, MD, PhD<sup>7</sup>;  
Tomoya Yamashita, MD, PhD<sup>9</sup>; Kenichi Hirata, MD, PhD<sup>5</sup>; Kazuhiro P. Izawa, PT, PhD<sup>1</sup>

<sup>1</sup>Department of Public Health, Graduate School of Health Sciences, Kobe University, Hyogo, Japan

<sup>2</sup>Department of Rehabilitation, Kobe City Medical Center General Hospital, Kobe, Japan

<sup>3</sup>Department of Rehabilitation Science, Osaka Health Science University, Osaka, Japan

<sup>4</sup>Department of Physical Therapy, Faculty of Nursing and Rehabilitation, Konan Women's University

<sup>5</sup>Division of Cardiovascular Medicine, Department of Internal Medicine, Kobe University Graduate School of Medicine, Hyogo, Japan

**NOTE:** This preprint reports new research that has not been certified by peer review and should not be used to guide clinical practice.

<sup>6</sup>Clinical Research Support Center, University of Miyazaki Hospital, Miyazaki, Japan

<sup>7</sup>Department of Medical and Health Information Management, National Cerebral and

Cardiovascular Center, Osaka, Japan

<sup>8</sup>Division of Rehabilitation Medicine, Kobe University Graduate School of Medicine, Kobe,

Japan

<sup>9</sup>Department of Advanced Medical Science, Kobe University Graduate School of Science,

Technology and Innovation, Hyogo, Japan

**Correspondence to:** Kazuhiro P. Izawa, PT, PhD

Department of Public Health, Graduate School of Health Sciences, Kobe University, 7-10-2

Tomogaoka, Suma-ku, Kobe, Hyogo 654-0142, Japan

TEL: +81-78-792-2555, E-mail: [izawapk@harbor.kobe-u.ac.jp](mailto:izawapk@harbor.kobe-u.ac.jp)

Total word count: 5954 words

## ABSTRACT

**BACKGROUND:** Intracerebral hemorrhage (ICH) has a high mortality rate, and even if patients survive, they are likely to have severe disability. Body mass index (BMI) is associated with ICH risk, and extremely low and high BMIs are associated with the site of ICH, which affects functional decline. However, few reports exist on ICH-related functional decline and BMI. This study aimed to clarify the relationship between BMI and stroke-related disability of patients with ICH.

**METHODS:** Patients with ICH registered in the Japanese Registry Of All Cardiac and Vascular Diseases Diagnosis Procedure Combination (JROAD-DPC) database from April 2016 to March 2020 were included. BMI was defined according to the World Health Organization Asia-Pacific classification. Functional disability was assessed using the modified Rankin Scale (mRS). ICH-related functional decline was defined as an increase in mRS score at discharge compared with that of the pre-stroke assessment.

**RESULTS:** This study included 155,211 patients with ICH whose median age was 72.0 years and mean BMI was 22.3 kg/m<sup>2</sup>. The ratio of patients with ICH who experience functional decline was 74.9%. The spline curve between BMI and ICH-related functional decline was U-shaped, revealing that the Normal to Obese I BMI groups (BMI: 22.2–30.4 kg/m<sup>2</sup>) exhibited reduced odds ratios for ICH-related functional decline. Hospitalization cost and BMI showed similar U-shaped patterns, with a BMI of 25.0 kg/m<sup>2</sup> as the lowest point,

regardless of age group.

**CONCLUSION:** In patients with ICH, those with both extremely low and high BMIs were more likely to experience functional decline after ICH onset, which resulted in increased hospitalization costs. To reduce ICH-related functional decline, patients should be managed at a normal to slightly obese BMI.

**Key Words:** body mass index, diagnosis procedure combination, intracerebral hemorrhage, Japanese Registry of All Cardiac and Vascular Diseases, modified Rankin Scale

# **Non-standard Abbreviations and Acronyms**

|           |                                                                                                |
|-----------|------------------------------------------------------------------------------------------------|
| ADL       | activities of daily living                                                                     |
| BMI       | body mass index                                                                                |
| ICD-10    | International Statistical Classification of Diseases and Related Health Problems 10th Revision |
| ICH       | intracerebral hemorrhage                                                                       |
| JROAD-DPC | Japanese Registry Of All Cardiac and Vascular Diseases Diagnosis Procedure Combination         |
| mRS       | modified Rankin Scale                                                                          |
| UTI       | urinary tract infection                                                                        |

73 WHO World Health Organization

## INTRODUCTION

### Epidemiology of Intracerebral Hemorrhage

Stroke is the second leading cause of death worldwide, with 12 million strokes and 101 million prevalent cases in 2019.<sup>1</sup> Over the past 30 years, the numbers of onsets of stroke, deaths, and prevalent cases have increased around the world,<sup>1</sup> making the investigation of effective strategies against stroke an important issue. Intracerebral hemorrhage (ICH) is the second most common form of stroke (27.9%).<sup>2</sup> The mortality rate for ICH is higher than that for ischemic stroke, and even if patients survive, they are more likely to have severe disability.<sup>2</sup> In fact, only 35% of patients with ICH had a favorable physical outcome at 30 days after onset,<sup>3</sup> and only 41% of patients who experienced ICH were independent in activities of daily living (ADL) at one year after ICH onset.<sup>4</sup> Disability-adjusted life-years due to stroke are also increasing.<sup>1</sup> Improvement of stroke-related disability and reintegration into society after ICH are also important issues.

### Relationship Between ICH and Body Mass Index

Body mass index (BMI) has been associated with ICH risk.<sup>5,6</sup> In general, obesity causes increased mortality or morbidity of cardiovascular disease in patients with ischemic stroke and ICH.<sup>7-9 10</sup> However, several reports have shown that the obesity paradox leads to lower mortality in overweight and obese patients with ICH.<sup>8,11,12</sup> Whether obesity is advantageous

for patients with ICH remains controversial.

The American Heart Association supposed the ideal BMI to be  $<25 \text{ kg/m}^2$ .<sup>10</sup> However, there are regional differences in BMI, and the Asian population tends to have a lower BMI.<sup>13,14</sup> In Japanese people, a BMI of about  $22 \text{ kg/m}^2$  is associated with the lowest incidence of obesity-related diseases, and the Japan Society for the Study of Obesity defined the standard weight for Japanese people as weight equivalent to a BMI of  $22 \text{ kg/m}^2$ .<sup>15</sup> Extremely low BMI ( $<18.5 \text{ kg/m}^2$ ) and high BMI ( $>30.0 \text{ kg/m}^2$ ) are associated with the site of ICH.<sup>16,17</sup> Symptoms and degree of functional impairment vary depending on the site of hemorrhage.<sup>18,19</sup> It remains unclear what range of BMI results in the fewest stroke-related symptoms in Japanese patients with ICH.

## Objective

In patients with ischemic stroke, BMI has been reported to be associated with stroke-related disability,<sup>8</sup> and although ICH is more likely to cause severe disability,<sup>2</sup> the relationship between BMI and stroke-related disability of patients with ICH is poorly documented and unclear. In the present study, we hypothesized that patients with higher BMI would likely experience functional decline after ICH. The study aim was thus to clarify the relationship between BMI and functional decline in Japanese patients with ICH. As a secondary outcome, we also examined the relationship between BMI and hospitalization costs in patients with

ICH.

## METHODS

### Study Design

This was a retrospective cohort study based on the Japanese Registry Of All Cardiac and Vascular Diseases Diagnosis Procedure Combination (JROAD-DPC) database. The JROAD-DPC database targets data on cardiovascular or cerebrovascular disease patients treated in facilities affiliated with the Japanese Circulation Society.<sup>20</sup> The JROAD-DPC database contains the following data: unique hospital identifier, patient age, sex, primary diagnoses, comorbidities, drugs, devices, diagnostic and therapeutic procedures, length of stay, and discharge status. The International Statistical Classification of Diseases and Related Health Problems 10th Revision (ICD-10) was used for primary diagnosis and comorbidity in the JROAD-DPC database.<sup>20</sup> The study was carried out in accordance with the Declaration of Helsinki<sup>21</sup> and was approved by the Kobe University Institutional Review Board (Approval No. B210052).

The inclusion criterion was hospitalization for ICH from April 2016 to March 2020. Exclusion criteria were (1) age <20 years old, (2) length of hospital stay <3 days, (3) no emergency admission, (4) hospitals with <10 beds, (5) hospital death, and (6) no brain



rehabilitation during hospitalization. The ICD-10 divided ICH into six groups: subcortical (I610), cortex (I611), brainstem (I613), cerebellum (I614), intraventricular (I615), and other types.

## **Variables**

We collected data on the following variables: age, sex, hospital code, hospital scale, hospitalization days, hospitalization cost, disposition, comorbidities (hypertension, diabetes mellitus, dyslipidemia, congestive heart failure, stroke, Charlson Comorbidity Index score),<sup>22</sup> smoking, treatment (drainage, evacuation, shunt), complications (pneumonia, urinary tract infection [UTI], bedsores), level of ADL at admission and discharge, and pre-stroke modified Rankin Scale (mRS) score and mRS score at discharge. The drainage, evacuation, and shunt treatment data were collected using the billing codes in reception data. ADL were assessed with the Barthel index,<sup>23</sup> which was done immediately after admission. We defined hospital scale as small: <100, medium: 100–500, and large: >500 beds. Hospitalization costs were converted into US dollars based on the exchange rate on January 10, 2024 (one US\$=145 Japanese yen).

## **BMI and Classification**

BMI was calculated by dividing body weight by the square of the height (kg/m<sup>2</sup>).

According to the World Health Organization (WHO) Asia-Pacific classification,<sup>13</sup> we divided participants into five BMI groups at admission, as follows: Underweight ( $\text{BMI} \leq 18.5 \text{ kg/m}^2$ ), Normal ( $18.5 \text{ kg/m}^2 < \text{BMI} \leq 23 \text{ kg/m}^2$ ), Overweight ( $23 \text{ kg/m}^2 < \text{BMI} \leq 25 \text{ kg/m}^2$ ), Obese I ( $25 \text{ kg/m}^2 < \text{BMI} \leq 30 \text{ kg/m}^2$ ), and Obese II ( $30 \text{ kg/m}^2 \leq \text{BMI}$ ).

### **Modified Rankin Scale**

The primary outcome was ICH-related functional decline.<sup>24</sup> The mRS is the most frequently used assessment tool for stroke-related disability<sup>25,26</sup> as a measure of outcome in stroke studies.<sup>27</sup> The mRS score ranges from 0 (no symptoms at all) to 6 (dead), with a higher score indicating increased disability. In the JROAD-DPC database, pre-stroke mRS was assessed for stroke-related disability before the onset of stroke,<sup>28,29</sup> and the mRS was used again for patient assessment just before discharge. If the mRS score at discharge was higher than the pre-stroke mRS score, we regarded this as indicative of ICH-related functional decline.

### **Statistical Methods**

Statistical analysis was conducted using the software R version 4.3.2.<sup>30</sup> Continuous variables are expressed as median [interquartile range] and categorical variables as number (%). Initially, a comparative analysis between the BMI groups by Asia WHO classification was conducted with ANOVA for continuous variables and by chi-square test or Fisher's exact test

for categorical variables and included missing values for several variables. Next, multiple mixed-effect logistic regression analysis was conducted for ICH-related functional decline as the dependent variable with the hospital code as a random intercept. Independent variables in the developed model were as follows: age, sex, BMI, hospital scale, smoking, ICH type, hypertension, diabetes mellitus, dyslipidemia, congestive heart failure, stroke, treatment (drainage, evacuation, shunt), complication (pneumonia, UTI, bedsores), and pre-stroke mRS score. We excluded missing values of the model variables and a pre-stroke mRS score of 5 as a further increase in mRS score to 6 would mean hospital death. The odds ratio (OR) of the outcome referenced normal BMI, large hospital scale, subcortical ICH, and pre-stroke mRS score=0. Finally, we created restricted cubic spline models based on the logistic regression analysis results for ICH-related functional decline. The spline models involved explanatory variables of the model. In addition, spline models were also created with hospitalization costs as the objective variable for patient ages 75 or over and under 75 years. The explanatory variables were based on the model.

## RESULTS

### Overall Trends

There were 222,318 patients with ICH admitted to the affiliated hospitals from April 2016 to

March 2020. Among these patients, 67,107 who met the exclusion criteria as shown in Figure 1 were excluded. Thus, the final analysis included 155,211 patients with ICH.

Overall, the median age was 72.0 [61.0, 81.0] years old, the female ratio was 44.8%, and the mean BMI was 22.3 [19.8, 25.1] kg/m<sup>2</sup>. Among the BMI groups, Normal comprised the greatest ratio of patients (38.1%), followed by Obese I (17.5%), Overweight (15.9%), Underweight (13.2%), and Obese II (5.3%). The ICH types included subcortical (78.1%), cortex (1.2%), brainstem (5.7%), cerebellum (8.6%), and intraventricular (2.4%). ICH-related functional decline occurred in 74.9% of the patients with ICH. The percentage of patients with a pre-stroke mRS of 0 was the highest at 56.5%, and that of patients with a mRS of 4 at discharge was highest at 32.4%. The median number of hospitalization days was 26.0 [17.0, 39.0], and hospitalization costs were \$8800 [\$5879, \$13,929] (Table 1).

## Comparison by BMI

Lower BMI was associated with higher age and female ratio. In addition, patients with lower BMI had a longer number of hospitalization days, higher hospitalization costs, and a lower rate of home discharge. Among ICH types, subcortical ICH remained the most common in all BMI groups, and brainstem ICH was more common in patients with a higher BMI. Coronary risk factors such as hypertension, diabetes mellitus, dyslipidemia, and smoking were more prevalent at a higher BMI, whereas complications such as pneumonia, UTI, and bedsores

occurred more frequently in patients with a lower BMI. A pre-stroke mRS score of 0 was the most common in each BMI group (42.1–70.8%). The rates of ICH-related functional decline for each BMI group were Underweight (70.4%), Normal (73.8%), Overweight (75.0%), Obese I (75.8%), and Obese II (76.3%). Patients with lower BMI had a higher percentage of mRS score of 5 (e.g., Underweight: 31.0%, Obese II: 13.6%) at discharge.

### **Odds Ratio of ICH-Related Functional Decline**

The multiple mixed-effects logistic regression analysis was conducted on patients with complete data (n=115,179). The analysis revealed that the OR of ICH-related functional decline was lower in the Overweight and Obese I groups and higher in the Underweight and Obese II groups, with the Normal group as a reference (Table 2). The OR of ICH-related functional decline was lowest in the Overweight group (OR: 0.90, 95% CI: 0.85–0.94). ICH-related functional decline was likely to be observed in patients with subcortical ICH, some treatments (drainage, evacuation, shunt), and complications (pneumonia, UTI, bedsores). The adjusted  $R^2$  value of this multiple regression model was 0.48. The spline curve for BMI and the OR of ICH-related functional decline was U-shaped, with BMI 25.4 kg/m<sup>2</sup> as the lowest point (Figure 2). The range of BMI of 22.2–30.4 kg/m<sup>2</sup> had an OR of <1 for ICH-related functional decline. Outside of this BMI range, the OR for a declining mRS tended to increase in patients with a lower BMI (Underweight).

226

## 227 **Hospitalization Costs**

228 The spline curves for BMI and hospitalization costs revealed that individuals aged 75 years or  
229 older incurred higher hospitalization costs than the overall median of \$8,801. The curves  
230 exhibited U-shapes for both age groups of patients: those 75 years or older and those under  
231 75 years. Notably, both curves reached their lowest points at a BMI of 25.0 kg/m<sup>2</sup> (Figure 3).

232

233

## 234 **DISCUSSION**

### 235 **Key Results**

236 The present study included 155,211 patients with ICH. The distribution of ICH types was as  
237 follows: subcortical (78.1%), cortex (1.2%), brainstem (5.7%), cerebellum (8.6%), and  
238 intraventricular (2.4%). ICH-related functional decline occurred in 74.9% of the patients with  
239 ICH. Multiple mixed-effects logistic regression analysis revealed that the OR of ICH-related  
240 functional decline was lower in the Overweight and Obese I groups. The spline curve for the  
241 OR of ICH-related functional decline exhibited a U-shape, with a BMI of 25.4 kg/m<sup>2</sup> as the  
242 lowest point. The BMI range of 22.2–30.4 kg/m<sup>2</sup> had an OR of <1 for ICH-related functional  
243 decline. These results differed from our hypothesis that patients with a higher BMI would  
244 experience ICH-related functional decline. Additionally, the spline curve for hospitalization

costs displayed U-shapes with BMI 25.0 kg/m<sup>2</sup> at the lowest point for both age groups of 75 years or over and under 75 years.

## **Generalizability**

Compared to a Japanese DPC study that did not include data from the JROAD-DPC database, the distribution of BMI followed a trend similar to that observed in the present study.<sup>31</sup> We also confirmed that patients in the higher BMI group tended to be younger, more were male, had a higher smoking prevalence, and were more likely to have hypertension and diabetes mellitus.<sup>31</sup> Despite the low home discharge rate of 26.9% in the present study, a nationwide U.S. database study of inpatients with ICH similarly reported a home discharge rate of approximately 20%.<sup>32</sup> Therefore, when considering patients with ICH, their characteristics do not differ significantly from those observed in other database studies.<sup>31,32</sup>

Compared to the Japan Stroke Data Bank report (n=9,741), the present study enrolled more patients with ICH (n=155,211),<sup>33</sup> and although the age of patients in the present study was slightly older, the ratio of woman was not significantly different. Lobar ICH, such as subcortical ICH, was greater than that in previous studies, and a similar trend of patients with higher BMI being likely to have more lobar ICH was also observed. As in the previous study,<sup>33</sup> the mRS at discharge was higher in the present study groups with extremely low and high BMI. The present study supported the findings of these previous studies, with the

additional finding that BMI was associated with ICH-related functional decline in a larger number of ICH cases.

In the present study, a pre-stroke mRS score of 0 was the most common (56.5%), which aligns with a generally similar trend observed in a previous study showing that pre-stroke mRS score of 0 accounted for 51% of the total.<sup>34</sup> The pre-stroke mRS score serves as a valuable tool for clinicians in treatment planning and delivery.<sup>34</sup> At discharge, an mRS score of 4 (moderately severe disability) was the most common. Another study also reported the same score as being the most frequent mRS score at discharge, except for the mRS score of 6 (death). Over the one-year follow-up period, 34% of all patients showed functional improvement and shifted to mRS scores of 0–3.<sup>35</sup> While many patients with ICH experience significant improvement, often from very severe disability, during the first three months, functional progress across the disability spectrum occurs from 3 to 6 months after the onset.<sup>35</sup> The mean length of hospitalization in the present study was 26.0 days, with limited follow-up carried out after the onset of ICH. Although post-discharge follow-up data were unavailable in this study, continuing rehabilitation and other interventions to enhance function after discharge remain crucial.

## Interpretation

The present study revealed that individuals with a slightly higher BMI (ranging from 22.2 to



30.4 kg/m<sup>2</sup>) had a lower OR for functional decline in the patients with ICH, similar to the concept of the obesity paradox observed in mortality studies.<sup>36</sup> In stroke patients, stress-related neuroendocrine and autonomic activation, inflammatory cytokines, increased oxygen-free radical load, and systemic hormonal changes collectively contribute to an overall catabolic state.<sup>37</sup> Obese patients may be better equipped to tolerate such nutritional disturbances due to greater fat and muscle mass metabolic reserve.<sup>12</sup> Additionally, another potential mechanism underlying the obesity paradox is resistance to unintended weight loss after ICH.<sup>12</sup> Patients with ICH are more susceptible to long-term weight loss compared to patients with ischemic stroke.<sup>38</sup> Conversely, low BMI negatively impacts the resumption of oral intake in stroke patients. ICH patients with low BMI may experience insufficient nutrient intake, leading to further weight loss and hypercatabolism.<sup>39</sup> We speculate that with their greater metabolic reserve, overweight to obese patients may possess a physiological advantage against functional decline as indicated by the mRS.

Intraventricular ICH is more likely to result in functional disability after discharge. Conversely, subcortical and cerebellar ICH have exhibited an OR of 0.26 for disability.<sup>3,4</sup> Therefore, the impact of different ICH sites on functional impairment is significant. ICH can be categorized into lobar ICH (isolated to the cortex) and deep ICH (such as in the brainstem). Extreme low or high BMI has been associated with an increased risk of deep ICH.<sup>16,17</sup> In our study, cerebellar hemorrhage was more common in the Normal and

Overweight groups, and the OR for ICH-related functional decline was lower in these groups. Conversely, the other BMI groups were associated with deeper ICH, including intraventricular and brainstem hemorrhages. Therefore, depending on the BMI at onset, trends may emerge regarding the site of ICH and the degree of functional disability. The BMI of patients should be managed to ensure that they maintain a BMI within the Normal to Obese I WHO categories and not those of the Underweight or Obese II categories..

The overall median cost of hospitalization of ICH patients in this study was \$8,800, which aligns with findings from a previous Japanese study reporting \$8,301.<sup>40</sup> The spline curves indicate that hospitalization costs were \$500 to \$2,000 higher for individuals aged 75 or over than for those under 75 years, regardless of BMI. Additionally, the spline curve exhibits a U-shape, similar to that for ICH-related functional decline, suggesting that preventing functional decline in patients with ICH may lead to reduced hospitalization costs.

### **Strengths and Limitations**

The strength of the present study lies in it being the first, to our knowledge, to examine the transition of functional decline before and after the onset of ICH with a focus on BMI. The spline curves revealed that the Normal to Obese I groups at admission were associated with favorable outcomes regarding functional decline and hospitalization costs. However, the present study also has several limitations. First, the JROAD-DPC database includes only

facilities participating in the Japan Circulation Society (JCS). The number of facilities treating cerebrovascular disease that have joined the JCS is less than that of the facilities for treating heart disease. Thus, whether the present study reflects the real world in Japan requires consideration. Second, ICH and comorbidities were evaluated using the ICD-10, which may have latent selection bias. In addition, we could not consider the presence of ICH histories nor the amount and extent of hemorrhage in ICH, which affects the prognosis. Third, rehabilitation is a major part of patient care, and its intervention significantly impacts functional transition after the onset of stroke.<sup>41</sup> Therefore, consideration should be given to the fact that the present study was limited to only those patients who underwent rehabilitation, which could affect the primary outcome. Finally, stroke-related disability was assessed by the mRS. However, the mRS has been criticized for its poor reproducibility, score grades that are not proportional to each other, its emphasis on motor function rather than cognitive or social function, and less consideration of other symptoms in neurological severity, such as state of consciousness and sensory function.<sup>26</sup> In addition, as we could not use the pre-stroke mRS to assess the patients' pre-stroke disability directly, the assessments were based on the collection of information on functional status and living conditions of the patients before the onset of ICH. Although the present study used the JROAD-DPC database, further research is needed using detailed data on ICH in clinical practice.

## CONCLUSION

This study represents the first examination of the relationship between BMI and stroke-related disability (measured by the mRS) following the onset of ICH. The final analysis included 155,211 patients with ICH, of whom 74.9% experienced functional decline. Notably, unlike our hypothesis, the analysis revealed that individuals in the Normal to Obese I BMI groups (with a BMI range of 22.2–30.4 kg/m<sup>2</sup>) exhibited reduced ORs for ICH-related functional decline. Furthermore, the spline curves showed that hospitalization costs followed U-shaped patterns, with a BMI of 25.0 kg/m<sup>2</sup> as the lowest point, regardless of age group. Similar to findings in mortality studies, the obesity paradox concept may also apply to functional decline after ICH, underscoring the importance of appropriate BMI management of patients at risk for stroke.

## Acknowledgment

We appreciate the contributions of the investigators, clinical research coordinators, and data managers involved in the JROAD-DPC study.

## Source of Funding

This work was supported by grants from the Japanese Circulation Society and JSPS

359 KAKENHI [Grant Numbers JP22K11392 and JP22K19708].

360

361 **Competing Interests**

362 None.

363

364 **Data availability**

365 Deidentified participant data in the JROAD-DPC study will not be shared.

## REFERENCES

1. GBD 2019 Stroke Collaborators. Global, regional, and national burden of stroke and its risk factors, 1990-2019: a systematic analysis for the Global Burden of Disease Study 2019. *Lancet Neurol.* 2021;20:795–820.
2. Fernando SM, Qureshi D, Talarico R, Tanuseputro P, Dowlathshahi D, Sood MM, Smith EE, Hill MD, McCredie VA, Scales DC, et al. Intracerebral hemorrhage incidence, mortality, and association with oral anticoagulation use: a population study. *Stroke.* 2021;52:1673–1681.
3. Cheung RTF, Zou LY. Use of the original, modified, or new intracerebral hemorrhage score to predict mortality and morbidity after intracerebral hemorrhage. *Stroke.* 2003;34:1717–1722.
4. Juvela S. Risk factors for impaired outcome after spontaneous intracerebral hemorrhage. *Arch Neurol.* 1995;52:1193–1200.
5. Silventoinen K, Magnusson PKE, Tynelius P, Batty GD, Rasmussen F. Association of body size and muscle strength with incidence of coronary heart disease and cerebrovascular diseases: a population-based cohort study of one million Swedish men. *Int J Epidemiol.* 2009;38:110–118.
6. Bazzano LA, Gu D, Whelton MR, Wu X, Chen CS, Duan X, Chen J, Chen JC, He J. Body mass index and risk of stroke among Chinese men and women. *Ann Neurol*

2010;67:11–20.

7. Winter JE, MacInnis RJ, Wattanapenpaiboon N, Nowson CA. BMI and all-cause mortality in older adults: a meta-analysis. *Am J Clin Nutr.* 2014;99:875–890.

8. Liu Z, Sanossian N, Starkman S, Avila-Rineck G, Eckstein M, Sharma LK, Liebeskind D, Conwit R, Hamilton S, Saver JL, et al. Adiposity and outcome after ischemic stroke. *Stroke.* 2021;52:144–151.

9. Song Y-M, Sung J, Smith GD, Ebrahim S. Body mass index and ischemic and hemorrhagic stroke. *Stroke.* 2004;35:831–836.

10. Sanchez E. Life’s simple 7: vital but not easy. *J Am Heart Assoc.* 2018;7:e009324.

11. Kim BJ, Lee SH, Ryu WS, Kim CK, Lee J, Yoon BW. Paradoxical longevity in obese patients with intracerebral hemorrhage. *Neurology.* 2011;76:567–573.

12. Wang Z, Wang J, Wang J, Liao Y, Hu X, Wang M. The obesity paradox in intracerebral hemorrhage: a systematic review and meta-analysis. *Front Endocrinol.* . 2023;14:1255538.

13. World Health Organization. Regional Office for the Western Pacific. The Asia-Pacific perspective: redefining obesity and its treatment. Sydney: Health Communications Australia; 2000.

14. Ni Mhurchu C, Rodgers A, Pan WH, Gu DF, Woodward M, Asia Pacific Cohort Studies Collaboration. Body mass index and cardiovascular disease in the Asia-Pacific Region:

- 404 an overview of 33 cohorts involving 310 000 participants. *Int J Epidemiol*.  
405 2004;33:751–758.
- 406 15. Kanazawa M, Yoshiike N, Osaka T, Numba Y, Zimmet P, Inoue S. Criteria and  
407 classification of obesity in Japan and Asia-Oceania. *Asia Pacific J Clin Nutr*.  
408 2002;11(Suppl):S732–S737.
- 409 16. Biffi A, Cortellini L, Nearnberg CM, Ayres AM, Schwab K, Gilson AJ, Rost NS,  
410 Goldstein JN, Viswanathan A, Greenberg SM, et al. Body mass index and etiology of  
411 intracerebral hemorrhage. *Stroke*. 2011;42:2526–2530.
- 412 17. Jolink WMT, Wiegertjes K, Rinkel GJE, Algra A, de Leeuw FE, Klijn CJM. Author  
413 Response: Location-specific risk factors for intracerebral hemorrhage: systematic  
414 review and meta-analysis. *Neurology*. 2021;96:1011.
- 415 18. Delcourt C, Sato S, Zhang S, Sandset EC, Zheng D, Chen X, Hackett ML, Arima H,  
416 Hata J, Heeley E, et al. Intracerebral hemorrhage location and outcome among  
417 INTERACT2 participants. *Neurology*. 2017;88:1408–1414.
- 418 19. Arboix A, Comes E, García-Eroles L, Massons J, Oliveres M, Balcells M, Targa C. Site  
419 of bleeding and early outcome in primary intracerebral hemorrhage. *Acta Neurol Scand*.  
420 2002;105:282–288.
- 421 20. Nakai M, Iwanaga Y, Sumita Y, Wada S, Hiramatsu H, Iihara K, Kohro T, Komuro I,  
422 Kuroda T, Matoba T, et al. Associations among cardiovascular and cerebrovascular



423 diseases: Analysis of the nationwide claims-based JROAD-DPC dataset. PLoS One.

424 2022;17:e0264390.

425 21. Rickham PP. Human Experimentation: Code of Ethics of W.M.A. *Br. Med. J.*

426 1964;2:177.

427 22. Charlson ME, Pompei P, Ales KL, MacKenzie CR. A new method of classifying

428 prognostic comorbidity in longitudinal studies: development and validation. *J Chronic*

429 *Dis.* 1987;40:373–383.

430 23. Mahoney FI, Barthel DW. Functional evaluation: The Barthel index. *Md State Med J.*

431 1965;14:61–65.

432 24. Rankin J. Cerebral vascular accidents in patients over the age of 60. II. Prognosis. *Scott*

433 *Med. J.* 1957;2:200–215.

434 25. do Carmo JF, Morelato RL, Pereira H, de Oliveira ERA. Disability after stroke: a

435 systematic review. *Fisioterapia em Movimento.* 2015;28:407–418.

436 26. Witsch J, Siegerink B, Nolte CH, Sprügel M, Steiner T, Endres M, Huttner HB.

437 Prognostication after intracerebral hemorrhage: a review. *Neurol Res Pract.* 2021;3:22.

438 27. Tilson JK, Sullivan KJ, Cen SY, Rose DK, Koradia CH, Azen SP, Duncan PW;

439 Locomotor Experience Applied Post Stroke (LEAPS) Investigative Team. Meaningful

440 gait speed improvement during the first 60 days poststroke: minimal clinically

441 important difference. *Phys Ther.* 2010;90:196–208.

- 442 28. Maestrini I, Rocchi L, Diana F, Requena Ruiz M, Elosua-Bayes I, Ribo M, Abdalkader  
443 M, Klein P, Gabrieli JD, Alexandre AM, et al. Outcomes and safety of endovascular  
444 treatment from 6 to 24 hours in patients with a pre-stroke moderate disability (mRS 3):  
445 a multicenter retrospective study. *J Neurointerv Surg.* 2024;jnis-2024-021634.
- 446 29. Zhang W, Coote S, Frost T, Dewey HM, Choi PMC. Acute stroke patients with mild-to-  
447 moderate pre-existing disability should be considered for thrombolysis treatment. *J*  
448 *Stroke Cerebrovasc Dis.* 2018;27:2707–2711.
- 449 30. R Core Team. R: A language and environment for statistical computing. R Foundation  
450 for Statistical Computing, <https://www.R-project.org/> (2023, accessed August 18,  
451 2023).
- 452 31. Itoh H, Kaneko H, Kiriyaama H, Kamon T, Fujiu K, Morita K, Yotsumoto H, Michihata  
453 N, Jo T, Takeda N, et al. Reverse J-shaped relationship between body mass index and  
454 in-hospital mortality of patients hospitalized for heart failure in Japan. *Heart Vessels.*  
455 2021;36:383–392.
- 456 32. Andaluz N, Zuccarello M. Recent trends in the treatment of spontaneous intracerebral  
457 hemorrhage: analysis of a nationwide inpatient database. *J Neurosurg.* 2009;110:403–  
458 410.
- 459 33. Miwa K, Nakai M, Yoshimura S, Sasahara Y, Wada S, Koge J, Ishigami A, Yagita Y,  
460 Kamiyama K, Miyamoto Y, et al. Clinical impact of body mass index on outcomes of

ischemic and hemorrhagic strokes. *Int J Stroke*. 2024;17474930241249370.

34. Quinn TJ, Taylor-Rowan M, Coyte A, Clark AB, Musgrave SD, Metcalf AK, Day DJ, Bachmann MO, Warburton EA, Potter JF, et al. Pre-stroke modified Rankin Scale: evaluation of validity, prognostic accuracy, and association with treatment. *Front Neurol*. 2017;8:275.
35. Hemphill JC 3rd, Farrant M, Neill TA Jr. Prospective validation of the ICH score for 12-month functional outcome. *Neurology*. 2009;73:1088–1094.
36. Elagizi A, Kachur S, Lavie CJ, Carbone S, Pandey A, Ortega FB, Milani RV. An overview and update on obesity and the obesity paradox in cardiovascular diseases. *Prog Cardiovasc Dis*. 2018;61:142–150.
37. Doehner W, Clark A, Anker SD. The obesity paradox: weighing the benefit. *Eur Heart J*. 2010;31:146–148.
38. Jönsson AC, Lindgren I, Norrving B, Lindgren A. Weight loss after stroke. *Stroke*. 2008;39:918–923.
39. Nakadate A, Otaka Y, Kondo K, Yamamoto R, Matsuura D, Honaga K, Muraoka K, Akaboshi K, Liu M. Age, body mass index, and white blood cell count predict the resumption of oral intake in subacute stroke patients. *J Stroke Cerebrovasc Dis*. 2016;25:2801–2808.
40. Yoneda Y, Okuda S, Hamada R, Toyota A, Gotoh J, Watanabe M, Okada Y, Ikeda K,

- 480 Ibayashi S, Hasegawa Y. Hospital cost of ischemic stroke and intracerebral hemorrhage  
481 in Japanese stroke centers. *Health Policy*. 2005;73:202–211.
- 482 41. Langhorne P, Bernhardt J, Kwakkel G. Stroke rehabilitation. *Lancet*. 2011;377:1693–  
483 1702.

## Figure Legends

### Figure 1. Flow of the present study.

This flowchart depicts selection of the present study patients with ICH using the JROAD-DPC database. JROAD-DPC, Japanese Registry of All Cardiovascular Diseases Diagnosis Procedure Combination.

### Figure 2. BMI spline curve for intracerebral hemorrhage-related functional decline.

This spline curve was created with body mass index on the x-axis and odds ratio of ICH-related functional decline on the y-axis. ICH, intracerebral hemorrhage.

### Figure 3. BMI spline curves for hospitalization cost.

Spline curves were stratified by age under 75 (blue) or age 75 or over (red), with body mass index on the x-axis and hospitalization cost on the y-axis.

JROAD-DPC database: Hospitalization with intracerebral hemorrhage  
from April 2016 to March 2020 (**n = 222,318**)

Excluded:

Age < 20 years (n = 2,513)

Length of hospital stay < 3 days (n = 25,252)

No emergency admission (n = 8,526)

Hospitals with < 10 beds (n = 759)

Hospital death (n = 20,629)

No brain rehabilitation (n = 9,428)

Study population in 1,017 hospitals (**n = 155,211**)

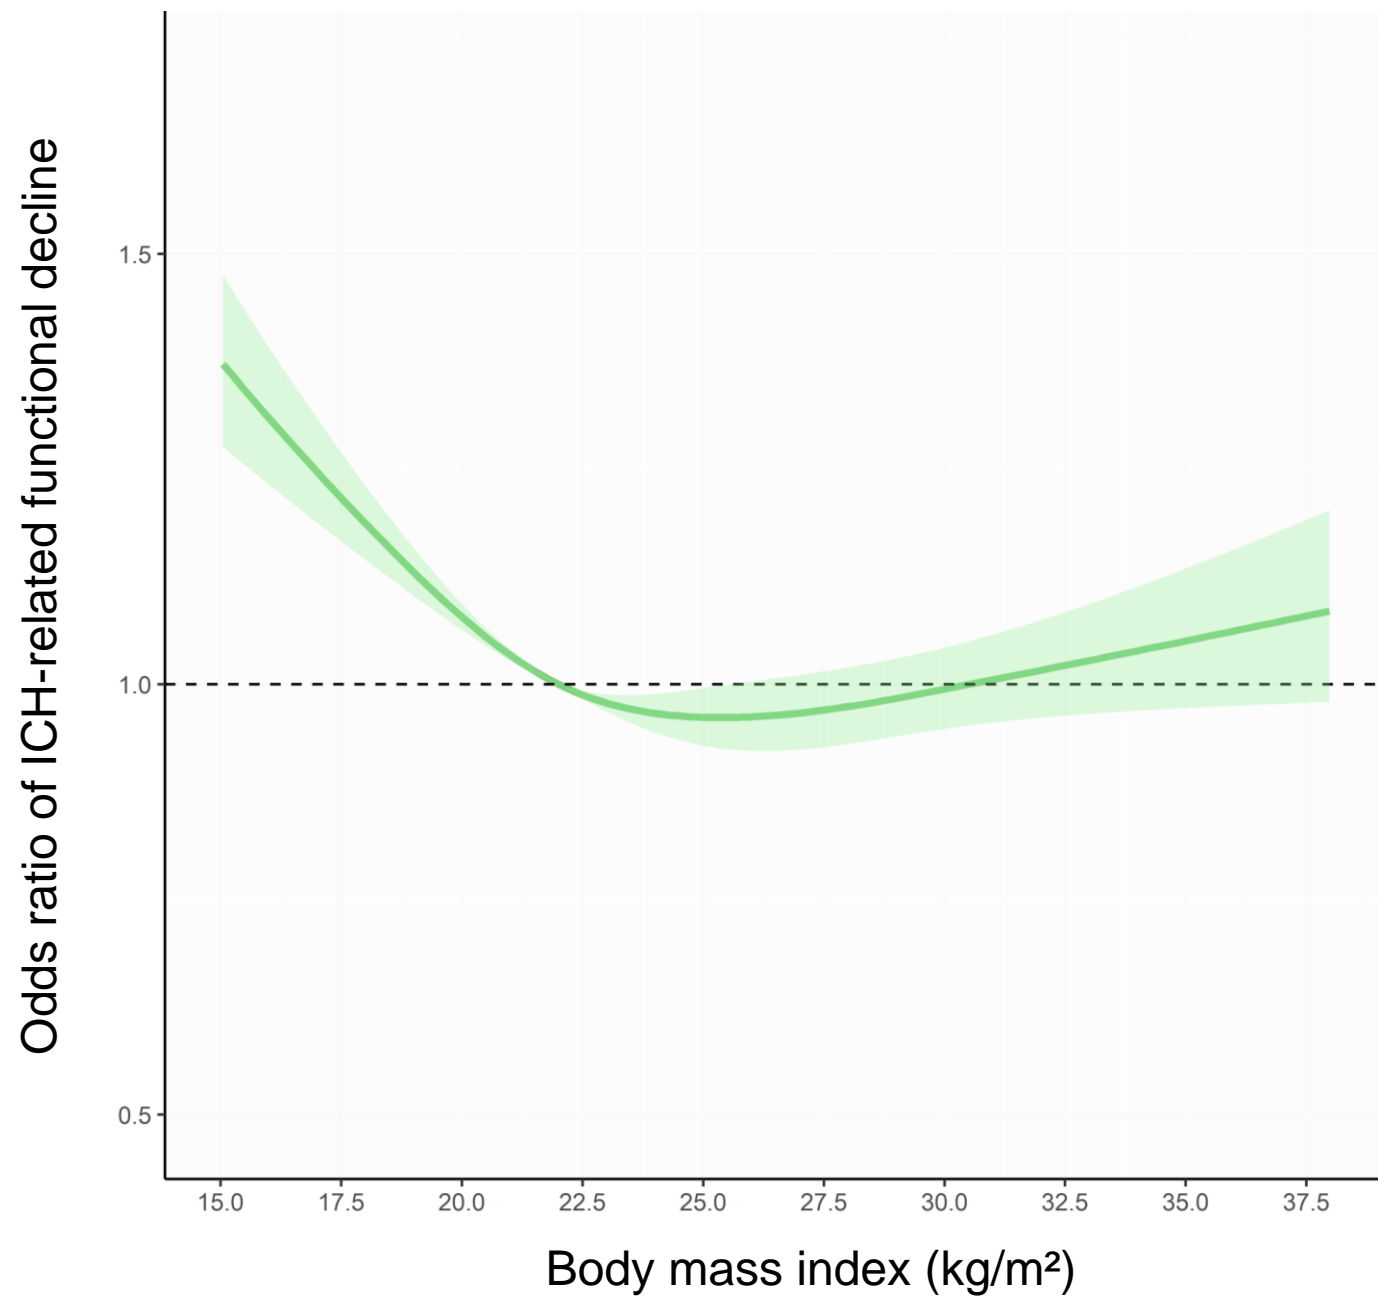

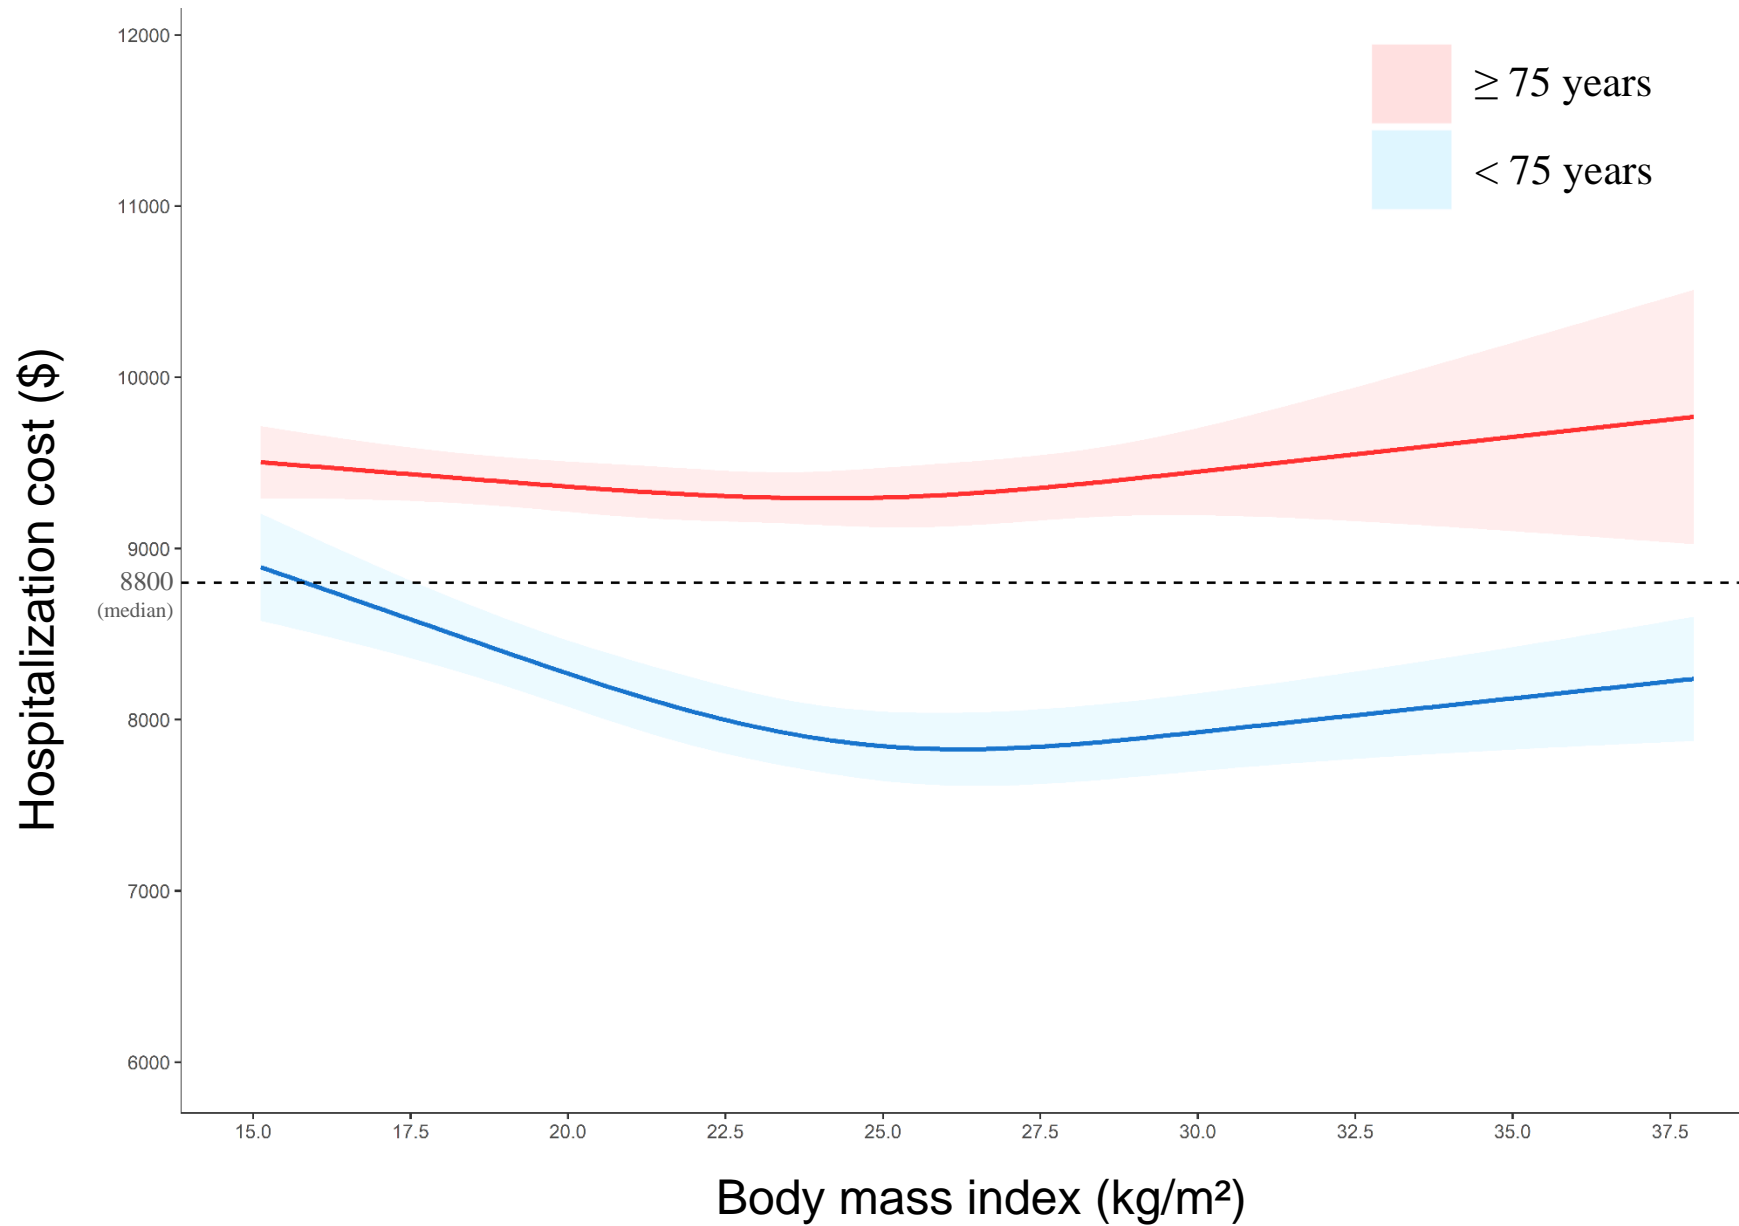

Source: https://medrxiv.org/content/10.1101/2024.07.01.24309789v1.full.pdf
