1 **U-shaped Relationship Between Body Mass Index and Intracerebral**

2 **Hemorrhage-Related Functional Decline**

3

4 **Short title:** BMI and Stroke-related Disability of ICH

5

6 Yuji Kanejima, PT, PhD<sup>1,2</sup>; Masato Ogawa, PT, PhD<sup>1,3,8</sup>; Kodai Ishihara, PT, PhD<sup>1,4</sup>;

7 Naofumi Yoshida, MD, PhD<sup>5,7</sup>; Michikazu Nakai, PhD<sup>6,7</sup>; Koshiro Kanaoka, MD, PhD<sup>7</sup>;

8 Yoko Sumita, MD, PhD<sup>7</sup>; Takuo Emoto, MD, PhD<sup>5</sup>; Yoshitada Sakai, MD, PhD<sup>8</sup>;

9 Yoshitaka Iwanaga, MD, PhD<sup>7</sup>; Yoshihiro Miyamoto, MD, PhD<sup>7</sup>;

10 Tomoya Yamashita, MD, PhD<sup>9</sup>; Kenichi Hirata, MD, PhD<sup>5</sup>; Kazuhiro P. Izawa, PT, PhD<sup>1</sup>

11

12 <sup>1</sup>Department of Public Health, Graduate School of Health Sciences, Kobe University, Hyogo,

13 Japan

14 <sup>2</sup>Department of Rehabilitation, Kobe City Medical Center General Hospital, Kobe, Japan

15 <sup>3</sup>Department of Rehabilitation Science, Osaka Health Science University, Osaka, Japan

16 <sup>4</sup>Department of Physical Therapy, Faculty of Nursing and Rehabilitation, Konan Women's

17 University

18 <sup>5</sup>Division of Cardiovascular Medicine, Department of Internal Medicine, Kobe University

19 Graduate School of Medicine, Hyogo, Japan

**NOTE:** This preprint reports new research that has not been certified by peer review and should not be used to guide clinical practice.

20 <sup>6</sup>Clinical Research Support Center, University of Miyazaki Hospital, Miyazaki, Japan

21 <sup>7</sup>Department of Medical and Health Information Management, National Cerebral and

22 Cardiovascular Center, Osaka, Japan

23 <sup>8</sup>Division of Rehabilitation Medicine, Kobe University Graduate School of Medicine, Kobe,

24 Japan

25 <sup>9</sup>Department of Advanced Medical Science, Kobe University Graduate School of Science,

26 Technology and Innovation, Hyogo, Japan

27

28 **Correspondence to:** Kazuhiro P. Izawa, PT, PhD

29 Department of Public Health, Graduate School of Health Sciences, Kobe University, 7-10-2

30 Tomogaoka, Suma-ku, Kobe, Hyogo 654-0142, Japan

31 TEL: +81-78-792-2555, E-mail: [izawapk@harbor.kobe-u.ac.jp](mailto:izawapk@harbor.kobe-u.ac.jp)

32

33 Total word count: 5954 words

34

35 **ABSTRACT**

36 **BACKGROUND:** Intracerebral hemorrhage (ICH) has a high mortality rate, and even if  
37 patients survive, they are likely to have severe disability. Body mass index (BMI) is  
38 associated with ICH risk, and extremely low and high BMIs are associated with the site of  
39 ICH, which affects functional decline. However, few reports exist on ICH-related functional  
40 decline and BMI. This study aimed to clarify the relationship between BMI and stroke-related  
41 disability of patients with ICH.

42 **METHODS:** Patients with ICH registered in the Japanese Registry Of All Cardiac and  
43 Vascular Diseases Diagnosis Procedure Combination (JROAD-DPC) database from April  
44 2016 to March 2020 were included. BMI was defined according to the World Health  
45 Organization Asia-Pacific classification. Functional disability was assessed using the  
46 modified Rankin Scale (mRS). ICH-related functional decline was defined as an increase in  
47 mRS score at discharge compared with that of the pre-stroke assessment.

48 **RESULTS:** This study included 155,211 patients with ICH whose median age was 72.0 years  
49 and mean BMI was 22.3 kg/m<sup>2</sup>. The ratio of patients with ICH who experience functional  
50 decline was 74.9%. The spline curve between BMI and ICH-related functional decline was  
51 U-shaped, revealing that the Normal to Obese I BMI groups (BMI: 22.2–30.4 kg/m<sup>2</sup>)  
52 exhibited reduced odds ratios for ICH-related functional decline. Hospitalization cost and  
53 BMI showed similar U-shaped patterns, with a BMI of 25.0 kg/m<sup>2</sup> as the lowest point,

54 regardless of age group.

55 **CONCLUSION:** In patients with ICH, those with both extremely low and high BMIs were  
56 more likely to experience functional decline after ICH onset, which resulted in increased  
57 hospitalization costs. To reduce ICH-related functional decline, patients should be managed at  
58 a normal to slightly obese BMI.

59

60 **Key Words:** body mass index, diagnosis procedure combination, intracerebral hemorrhage,  
61 Japanese Registry of All Cardiac and Vascular Diseases, modified Rankin Scale

62

### 63 **Non-standard Abbreviations and Acronyms**

64 ADL activities of daily living

65 BMI body mass index

66 ICD-10 International Statistical Classification of Diseases and Related Health  
67 Problems 10th Revision

68 ICH intracerebral hemorrhage

69 JROAD-DPC Japanese Registry Of All Cardiac and Vascular Diseases Diagnosis  
70 Procedure Combination

71 mRS modified Rankin Scale

72 UTI urinary tract infection

73 WHO World Health Organization

## 74 **INTRODUCTION**

### 75 **Epidemiology of Intracerebral Hemorrhage**

76 Stroke is the second leading cause of death worldwide, with 12 million strokes and 101  
77 million prevalent cases in 2019.<sup>1</sup> Over the past 30 years, the numbers of onsets of stroke,  
78 deaths, and prevalent cases have increased around the world,<sup>1</sup> making the investigation of  
79 effective strategies against stroke an important issue. Intracerebral hemorrhage (ICH) is the  
80 second most common form of stroke (27.9%).<sup>2</sup> The mortality rate for ICH is higher than that  
81 for ischemic stroke, and even if patients survive, they are more likely to have severe  
82 disability.<sup>2</sup> In fact, only 35% of patients with ICH had a favorable physical outcome at 30  
83 days after onset,<sup>3</sup> and only 41% of patients who experienced ICH were independent in  
84 activities of daily living (ADL) at one year after ICH onset.<sup>4</sup> Disability-adjusted life-years  
85 due to stroke are also increasing.<sup>1</sup> Improvement of stroke-related disability and reintegration  
86 into society after ICH are also important issues.

87

### 88 **Relationship Between ICH and Body Mass Index**

89 Body mass index (BMI) has been associated with ICH risk.<sup>5,6</sup> In general, obesity causes  
90 increased mortality or morbidity of cardiovascular disease in patients with ischemic stroke  
91 and ICH.<sup>7-9 10</sup> However, several reports have shown that the obesity paradox leads to lower  
92 mortality in overweight and obese patients with ICH.<sup>8,11,12</sup> Whether obesity is advantageous

93 for patients with ICH remains controversial.

94 The American Heart Association supposed the ideal BMI to be  $<25 \text{ kg/m}^2$ .<sup>10</sup> However,

95 there are regional differences in BMI, and the Asian population tends to have a lower

96 BMI.<sup>13,14</sup> In Japanese people, a BMI of about  $22 \text{ kg/m}^2$  is associated with the lowest

97 incidence of obesity-related diseases, and the Japan Society for the Study of Obesity defined

98 the standard weight for Japanese people as weight equivalent to a BMI of  $22 \text{ kg/m}^2$ .<sup>15</sup>

99 Extremely low BMI ( $<18.5 \text{ kg/m}^2$ ) and high BMI ( $>30.0 \text{ kg/m}^2$ ) are associated with the site

100 of ICH.<sup>16,17</sup> Symptoms and degree of functional impairment vary depending on the site of

101 hemorrhage.<sup>18,19</sup> It remains unclear what range of BMI results in the fewest stroke-related

102 symptoms in Japanese patients with ICH.

103

#### 104 **Objective**

105 In patients with ischemic stroke, BMI has been reported to be associated with stroke-related

106 disability,<sup>8</sup> and although ICH is more likely to cause severe disability,<sup>2</sup> the relationship

107 between BMI and stroke-related disability of patients with ICH is poorly documented and

108 unclear. In the present study, we hypothesized that patients with higher BMI would likely

109 experience functional decline after ICH. The study aim was thus to clarify the relationship

110 between BMI and functional decline in Japanese patients with ICH. As a secondary outcome,

111 we also examined the relationship between BMI and hospitalization costs in patients with

112 ICH.

113

114

## 115 **METHODS**

### 116 **Study Design**

117 This was a retrospective cohort study based on the Japanese Registry Of All Cardiac  
118 and Vascular Diseases Diagnosis Procedure Combination (JROAD-DPC) database. The  
119 JROAD-DPC database targets data on cardiovascular or cerebrovascular disease patients  
120 treated in facilities affiliated with the Japanese Circulation Society.<sup>20</sup> The JROAD-DPC  
121 database contains the following data: unique hospital identifier, patient age, sex, primary  
122 diagnoses, comorbidities, drugs, devices, diagnostic and therapeutic procedures, length of  
123 stay, and discharge status. The International Statistical Classification of Diseases and Related  
124 Health Problems 10th Revision (ICD-10) was used for primary diagnosis and comorbidity in  
125 the JROAD-DPC database.<sup>20</sup> The study was carried out in accordance with the Declaration of  
126 Helsinki<sup>21</sup> and was approved by the Kobe University Institutional Review Board (Approval  
127 No. B210052).

128 The inclusion criterion was hospitalization for ICH from April 2016 to March 2020.  
129 Exclusion criteria were (1) age <20 years old, (2) length of hospital stay <3 days, (3) no  
130 emergency admission, (4) hospitals with <10 beds, (5) hospital death, and (6) no brain



131 rehabilitation during hospitalization. The ICD-10 divided ICH into six groups: subcortical  
132 (I610), cortex (I611), brainstem (I613), cerebellum (I614), intraventricular (I615), and other  
133 types.

134

### 135 **Variables**

136 We collected data on the following variables: age, sex, hospital code, hospital scale,  
137 hospitalization days, hospitalization cost, disposition, comorbidities (hypertension, diabetes  
138 mellitus, dyslipidemia, congestive heart failure, stroke, Charlson Comorbidity Index score),<sup>22</sup>  
139 smoking, treatment (drainage, evacuation, shunt), complications (pneumonia, urinary tract  
140 infection [UTI], bedsores), level of ADL at admission and discharge, and pre-stroke modified  
141 Rankin Scale (mRS) score and mRS score at discharge. The drainage, evacuation, and shunt  
142 treatment data were collected using the billing codes in reception data. ADL were assessed  
143 with the Barthel index,<sup>23</sup> which was done immediately after admission. We defined hospital  
144 scale as small: <100, medium: 100–500, and large: >500 beds. Hospitalization costs were  
145 converted into US dollars based on the exchange rate on January 10, 2024 (one US\$=145  
146 Japanese yen).

147

### 148 **BMI and Classification**

149 BMI was calculated by dividing body weight by the square of the height (kg/m<sup>2</sup>).

150 According to the World Health Organization (WHO) Asia-Pacific classification,<sup>13</sup> we divided  
151 participants into five BMI groups at admission, as follows: Underweight ( $\text{BMI} \leq 18.5 \text{ kg/m}^2$ ),  
152 Normal ( $18.5 \text{ kg/m}^2 < \text{BMI} \leq 23 \text{ kg/m}^2$ ), Overweight ( $23 \text{ kg/m}^2 < \text{BMI} \leq 25 \text{ kg/m}^2$ ), Obese I  
153 ( $25 \text{ kg/m}^2 < \text{BMI} \leq 30 \text{ kg/m}^2$ ), and Obese II ( $30 \text{ kg/m}^2 \leq \text{BMI}$ ).

154

### 155 **Modified Rankin Scale**

156 The primary outcome was ICH-related functional decline.<sup>24</sup> The mRS is the most frequently  
157 used assessment tool for stroke-related disability<sup>25,26</sup> as a measure of outcome in stroke  
158 studies.<sup>27</sup> The mRS score ranges from 0 (no symptoms at all) to 6 (dead), with a higher score  
159 indicating increased disability. In the JROAD-DPC database, pre-stroke mRS was assessed  
160 for stroke-related disability before the onset of stroke,<sup>28,29</sup> and the mRS was used again for  
161 patient assessment just before discharge. If the mRS score at discharge was higher than the  
162 pre-stroke mRS score, we regarded this as indicative of ICH-related functional decline.

163

### 164 **Statistical Methods**

165 Statistical analysis was conducted using the software R version 4.3.2.<sup>30</sup> Continuous variables  
166 are expressed as median [interquartile range] and categorical variables as number (%).  
167 Initially, a comparative analysis between the BMI groups by Asia WHO classification was  
168 conducted with ANOVA for continuous variables and by chi-square test or Fisher's exact test

169 for categorical variables and included missing values for several variables. Next, multiple  
170 mixed-effect logistic regression analysis was conducted for ICH-related functional decline as  
171 the dependent variable with the hospital code as a random intercept. Independent variables in  
172 the developed model were as follows: age, sex, BMI, hospital scale, smoking, ICH type,  
173 hypertension, diabetes mellitus, dyslipidemia, congestive heart failure, stroke, treatment  
174 (drainage, evacuation, shunt), complication (pneumonia, UTI, bedsores), and pre-stroke mRS  
175 score. We excluded missing values of the model variables and a pre-stroke mRS score of 5 as  
176 a further increase in mRS score to 6 would mean hospital death. The odds ratio (OR) of the  
177 outcome referenced normal BMI, large hospital scale, subcortical ICH, and pre-stroke mRS  
178 score=0. Finally, we created restricted cubic spline models based on the logistic regression  
179 analysis results for ICH-related functional decline. The spline models involved explanatory  
180 variables of the model. In addition, spline models were also created with hospitalization costs  
181 as the objective variable for patient ages 75 or over and under 75 years. The explanatory  
182 variables were based on the model.

183

184

## 185 **RESULTS**

### 186 **Overall Trends**

187 There were 222,318 patients with ICH admitted to the affiliated hospitals from April 2016 to

188 March 2020. Among these patients, 67,107 who met the exclusion criteria as shown in Figure  
189 1 were excluded. Thus, the final analysis included 155,211 patients with ICH.

190 Overall, the median age was 72.0 [61.0, 81.0] years old, the female ratio was 44.8%,  
191 and the mean BMI was 22.3 [19.8, 25.1] kg/m<sup>2</sup>. Among the BMI groups, Normal comprised  
192 the greatest ratio of patients (38.1%), followed by Obese I (17.5%), Overweight (15.9%),  
193 Underweight (13.2%), and Obese II (5.3%). The ICH types included subcortical (78.1%),  
194 cortex (1.2%), brainstem (5.7%), cerebellum (8.6%), and intraventricular (2.4%). ICH-related  
195 functional decline occurred in 74.9% of the patients with ICH. The percentage of patients  
196 with a pre-stroke mRS of 0 was the highest at 56.5%, and that of patients with a mRS of 4 at  
197 discharge was highest at 32.4%. The median number of hospitalization days was 26.0 [17.0,  
198 39.0], and hospitalization costs were \$8800 [\$5879, \$13,929] (Table 1).

199

## 200 **Comparison by BMI**

201 Lower BMI was associated with higher age and female ratio. In addition, patients with lower  
202 BMI had a longer number of hospitalization days, higher hospitalization costs, and a lower  
203 rate of home discharge. Among ICH types, subcortical ICH remained the most common in all  
204 BMI groups, and brainstem ICH was more common in patients with a higher BMI. Coronary  
205 risk factors such as hypertension, diabetes mellitus, dyslipidemia, and smoking were more  
206 prevalent at a higher BMI, whereas complications such as pneumonia, UTI, and bedsores

207 occurred more frequently in patients with a lower BMI. A pre-stroke mRS score of 0 was the  
208 most common in each BMI group (42.1–70.8%). The rates of ICH-related functional decline  
209 for each BMI group were Underweight (70.4%), Normal (73.8%), Overweight (75.0%),  
210 Obese I (75.8%), and Obese II (76.3%). Patients with lower BMI had a higher percentage of  
211 mRS score of 5 (e.g., Underweight: 31.0%, Obese II: 13.6%) at discharge.

212

### 213 **Odds Ratio of ICH-Related Functional Decline**

214 The multiple mixed-effects logistic regression analysis was conducted on patients with  
215 complete data (n=115,179). The analysis revealed that the OR of ICH-related functional  
216 decline was lower in the Overweight and Obese I groups and higher in the Underweight and  
217 Obese II groups, with the Normal group as a reference (Table 2). The OR of ICH-related  
218 functional decline was lowest in the Overweight group (OR: 0.90, 95% CI: 0.85–0.94). ICH-  
219 related functional decline was likely to be observed in patients with subcortical ICH, some  
220 treatments (drainage, evacuation, shunt), and complications (pneumonia, UTI, bedsores). The  
221 adjusted  $R^2$  value of this multiple regression model was 0.48. The spline curve for BMI and  
222 the OR of ICH-related functional decline was U-shaped, with BMI 25.4 kg/m<sup>2</sup> as the lowest  
223 point (Figure 2). The range of BMI of 22.2–30.4 kg/m<sup>2</sup> had an OR of <1 for ICH-related  
224 functional decline. Outside of this BMI range, the OR for a declining mRS tended to increase  
225 in patients with a lower BMI (Underweight).

226

## 227 **Hospitalization Costs**

228 The spline curves for BMI and hospitalization costs revealed that individuals aged 75 years or  
229 older incurred higher hospitalization costs than the overall median of \$8,801. The curves  
230 exhibited U-shapes for both age groups of patients: those 75 years or older and those under  
231 75 years. Notably, both curves reached their lowest points at a BMI of 25.0 kg/m<sup>2</sup> (Figure 3).

232

233

## 234 **DISCUSSION**

### 235 **Key Results**

236 The present study included 155,211 patients with ICH. The distribution of ICH types was as  
237 follows: subcortical (78.1%), cortex (1.2%), brainstem (5.7%), cerebellum (8.6%), and  
238 intraventricular (2.4%). ICH-related functional decline occurred in 74.9% of the patients with  
239 ICH. Multiple mixed-effects logistic regression analysis revealed that the OR of ICH-related  
240 functional decline was lower in the Overweight and Obese I groups. The spline curve for the  
241 OR of ICH-related functional decline exhibited a U-shape, with a BMI of 25.4 kg/m<sup>2</sup> as the  
242 lowest point. The BMI range of 22.2–30.4 kg/m<sup>2</sup> had an OR of <1 for ICH-related functional  
243 decline. These results differed from our hypothesis that patients with a higher BMI would  
244 experience ICH-related functional decline. Additionally, the spline curve for hospitalization

245 costs displayed U-shapes with BMI 25.0 kg/m<sup>2</sup> at the lowest point for both age groups of 75  
246 years or over and under 75 years.

247

## 248 **Generalizability**

249 Compared to a Japanese DPC study that did not include data from the JROAD-DPC database,  
250 the distribution of BMI followed a trend similar to that observed in the present study.<sup>31</sup> We  
251 also confirmed that patients in the higher BMI group tended to be younger, more were male,  
252 had a higher smoking prevalence, and were more likely to have hypertension and diabetes  
253 mellitus.<sup>31</sup> Despite the low home discharge rate of 26.9% in the present study, a nationwide  
254 U.S. database study of inpatients with ICH similarly reported a home discharge rate of  
255 approximately 20%.<sup>32</sup> Therefore, when considering patients with ICH, their characteristics do  
256 not differ significantly from those observed in other database studies.<sup>31,32</sup>

257 Compared to the Japan Stroke Data Bank report (n=9,741), the present study enrolled  
258 more patients with ICH (n=155,211),<sup>33</sup> and although the age of patients in the present study  
259 was slightly older, the ratio of woman was not significantly different. Lobar ICH, such as  
260 subcortical ICH, was greater than that in previous studies, and a similar trend of patients with  
261 higher BMI being likely to have more lobar ICH was also observed. As in the previous  
262 study,<sup>33</sup> the mRS at discharge was higher in the present study groups with extremely low and  
263 high BMI. The present study supported the findings of these previous studies, with the

264 additional finding that BMI was associated with ICH-related functional decline in a larger  
265 number of ICH cases.

266 In the present study, a pre-stroke mRS score of 0 was the most common (56.5%), which  
267 aligns with a generally similar trend observed in a previous study showing that pre-stroke  
268 mRS score of 0 accounted for 51% of the total.<sup>34</sup> The pre-stroke mRS score serves as a  
269 valuable tool for clinicians in treatment planning and delivery.<sup>34</sup> At discharge, an mRS score  
270 of 4 (moderately severe disability) was the most common. Another study also reported the  
271 same score as being the most frequent mRS score at discharge, except for the mRS score of 6  
272 (death). Over the one-year follow-up period, 34% of all patients showed functional  
273 improvement and shifted to mRS scores of 0–3.<sup>35</sup> While many patients with ICH experience  
274 significant improvement, often from very severe disability, during the first three months,  
275 functional progress across the disability spectrum occurs from 3 to 6 months after the onset.<sup>35</sup>  
276 The mean length of hospitalization in the present study was 26.0 days, with limited follow-up  
277 carried out after the onset of ICH. Although post-discharge follow-up data were unavailable  
278 in this study, continuing rehabilitation and other interventions to enhance function after  
279 discharge remain crucial.

280

## 281 **Interpretation**

282 The present study revealed that individuals with a slightly higher BMI (ranging from 22.2 to



283 30.4 kg/m<sup>2</sup>) had a lower OR for functional decline in the patients with ICH, similar to the  
284 concept of the obesity paradox observed in mortality studies.<sup>36</sup> In stroke patients, stress-  
285 related neuroendocrine and autonomic activation, inflammatory cytokines, increased oxygen-  
286 free radical load, and systemic hormonal changes collectively contribute to an overall  
287 catabolic state.<sup>37</sup> Obese patients may be better equipped to tolerate such nutritional  
288 disturbances due to greater fat and muscle mass metabolic reserve.<sup>12</sup> Additionally, another  
289 potential mechanism underlying the obesity paradox is resistance to unintended weight loss  
290 after ICH.<sup>12</sup> Patients with ICH are more susceptible to long-term weight loss compared to  
291 patients with ischemic stroke.<sup>38</sup> Conversely, low BMI negatively impacts the resumption of  
292 oral intake in stroke patients. ICH patients with low BMI may experience insufficient nutrient  
293 intake, leading to further weight loss and hypercatabolism.<sup>39</sup> We speculate that with their  
294 greater metabolic reserve, overweight to obese patients may possess a physiological  
295 advantage against functional decline as indicated by the mRS.

296 Intraventricular ICH is more likely to result in functional disability after discharge.  
297 Conversely, subcortical and cerebellar ICH have exhibited an OR of 0.26 for disability.<sup>3,4</sup>  
298 Therefore, the impact of different ICH sites on functional impairment is significant. ICH can  
299 be categorized into lobar ICH (isolated to the cortex) and deep ICH (such as in the  
300 brainstem). Extreme low or high BMI has been associated with an increased risk of deep  
301 ICH.<sup>16,17</sup> In our study, cerebellar hemorrhage was more common in the Normal and

302 Overweight groups, and the OR for ICH-related functional decline was lower in these groups.  
303 Conversely, the other BMI groups were associated with deeper ICH, including  
304 intraventricular and brainstem hemorrhages. Therefore, depending on the BMI at onset,  
305 trends may emerge regarding the site of ICH and the degree of functional disability. The BMI  
306 of patients should be managed to ensure that they maintain a BMI within the Normal to  
307 Obese I WHO categories and not those of the Underweight or Obese II categories..

308 The overall median cost of hospitalization of ICH patients in this study was \$8,800,  
309 which aligns with findings from a previous Japanese study reporting \$8,301.<sup>40</sup> The spline  
310 curves indicate that hospitalization costs were \$500 to \$2,000 higher for individuals aged 75  
311 or over than for those under 75 years, regardless of BMI. Additionally, the spline curve  
312 exhibits a U-shape, similar to that for ICH-related functional decline, suggesting that  
313 preventing functional decline in patients with ICH may lead to reduced hospitalization costs.

314

### 315 **Strengths and Limitations**

316 The strength of the present study lies in it being the first, to our knowledge, to examine the  
317 transition of functional decline before and after the onset of ICH with a focus on BMI. The  
318 spline curves revealed that the Normal to Obese I groups at admission were associated with  
319 favorable outcomes regarding functional decline and hospitalization costs. However, the  
320 present study also has several limitations. First, the JROAD-DPC database includes only

321 facilities participating in the Japan Circulation Society (JCS). The number of facilities  
322 treating cerebrovascular disease that have joined the JCS is less than that of the facilities for  
323 treating heart disease. Thus, whether the present study reflects the real world in Japan  
324 requires consideration. Second, ICH and comorbidities were evaluated using the ICD-10,  
325 which may have latent selection bias. In addition, we could not consider the presence of ICH  
326 histories nor the amount and extent of hemorrhage in ICH, which affects the prognosis. Third,  
327 rehabilitation is a major part of patient care, and its intervention significantly impacts  
328 functional transition after the onset of stroke.<sup>41</sup> Therefore, consideration should be given to  
329 the fact that the present study was limited to only those patients who underwent  
330 rehabilitation, which could affect the primary outcome. Finally, stroke-related disability was  
331 assessed by the mRS. However, the mRS has been criticized for its poor reproducibility, score  
332 grades that are not proportional to each other, its emphasis on motor function rather than  
333 cognitive or social function, and less consideration of other symptoms in neurological  
334 severity, such as state of consciousness and sensory function.<sup>26</sup> In addition, as we could not  
335 use the pre-stroke mRS to assess the patients' pre-stroke disability directly, the assessments  
336 were based on the collection of information on functional status and living conditions of the  
337 patients before the onset of ICH. Although the present study used the JROAD-DPC database,  
338 further research is needed using detailed data on ICH in clinical practice.  
339

340 **CONCLUSION**

341 This study represents the first examination of the relationship between BMI and stroke-  
342 related disability (measured by the mRS) following the onset of ICH. The final analysis  
343 included 155,211 patients with ICH, of whom 74.9% experienced functional decline.  
344 Notably, unlike our hypothesis, the analysis revealed that individuals in the Normal to Obese  
345 I BMI groups (with a BMI range of 22.2–30.4 kg/m<sup>2</sup>) exhibited reduced ORs for ICH-related  
346 functional decline. Furthermore, the spline curves showed that hospitalization costs followed  
347 U-shaped patterns, with a BMI of 25.0 kg/m<sup>2</sup> as the lowest point, regardless of age group.  
348 Similar to findings in mortality studies, the obesity paradox concept may also apply to  
349 functional decline after ICH, underscoring the importance of appropriate BMI management  
350 of patients at risk for stroke.

351

352

353 **Acknowledgment**

354 We appreciate the contributions of the investigators, clinical research coordinators, and data  
355 managers involved in the JROAD-DPC study.

356

357 **Source of Funding**

358 This work was supported by grants from the Japanese Circulation Society and JSPS

359 KAKENHI [Grant Numbers JP22K11392 and JP22K19708].

360

361 **Competing Interests**

362 None.

363

364 **Data availability**

365 Deidentified participant data in the JROAD-DPC study will not be shared.

366 **REFERENCES**

- 367 1. GBD 2019 Stroke Collaborators. Global, regional, and national burden of stroke and its  
368 risk factors, 1990-2019: a systematic analysis for the Global Burden of Disease Study  
369 2019. *Lancet Neurol.* 2021;20:795–820.
- 370 2. Fernando SM, Qureshi D, Talarico R, Tanuseputro P, Dowlatshahi D, Sood MM, Smith  
371 EE, Hill MD, McCredie VA, Scales DC, et al. Intracerebral hemorrhage incidence,  
372 mortality, and association with oral anticoagulation use: a population study. *Stroke.*  
373 2021;52:1673–1681.
- 374 3. Cheung RTF, Zou LY. Use of the original, modified, or new intracerebral hemorrhage  
375 score to predict mortality and morbidity after intracerebral hemorrhage. *Stroke.*  
376 2003;34:1717–1722.
- 377 4. Juvela S. Risk factors for impaired outcome after spontaneous intracerebral  
378 hemorrhage. *Arch Neurol.* 1995;52:1193–1200.
- 379 5. Silventoinen K, Magnusson PKE, Tynelius P, Batty GD, Rasmussen F. Association of  
380 body size and muscle strength with incidence of coronary heart disease and  
381 cerebrovascular diseases: a population-based cohort study of one million Swedish men.  
382 *Int J Epidemiol.* 2009;38:110–118.
- 383 6. Bazzano LA, Gu D, Whelton MR, Wu X, Chen CS, Duan X, Chen J, Chen JC, He J.  
384 Body mass index and risk of stroke among Chinese men and women. *Ann Neurol*

- 385 2010;67:11–20.
- 386 7. Winter JE, MacInnis RJ, Wattanapenpaiboon N, Nowson CA. BMI and all-cause  
387 mortality in older adults: a meta-analysis. *Am J Clin Nutr.* 2014;99:875–890.
- 388 8. Liu Z, Sanossian N, Starkman S, Avila-Rinek G, Eckstein M, Sharma LK, Liebeskind  
389 D, Conwit R, Hamilton S, Saver JL, et al. Adiposity and outcome after ischemic stroke.  
390 *Stroke.* 2021;52:144–151.
- 391 9. Song Y-M, Sung J, Smith GD, Ebrahim S. Body mass index and ischemic and  
392 hemorrhagic stroke. *Stroke.* 2004;35:831–836.
- 393 10. Sanchez E. Life’s simple 7: vital but not easy. *J Am Heart Assoc.* 2018;7:e009324.
- 394 11. Kim BJ, Lee SH, Ryu WS, Kim CK, Lee J, Yoon BW. Paradoxical longevity in obese  
395 patients with intracerebral hemorrhage. *Neurology.* 2011;76:567–573.
- 396 12. Wang Z, Wang J, Wang J, Liao Y, Hu X, Wang M. The obesity paradox in intracerebral  
397 hemorrhage: a systematic review and meta-analysis. *Front Endocrinol.* .  
398 2023;14:1255538.
- 399 13 World Health Organization. Regional Office for the Western Pacific. The Asia-Pacific  
400 perspective: redefining obesity and its treatment. Sydney: Health Communications  
401 Australia; 2000.
- 402 14. Ni Mhurchu C, Rodgers A, Pan WH, Gu DF, Woodward M, Asia Pacific Cohort Studies  
403 Collaboration. Body mass index and cardiovascular disease in the Asia-Pacific Region:

- 404 an overview of 33 cohorts involving 310 000 participants. *Int J Epidemiol*.  
405 2004;33:751–758.
- 406 15. Kanazawa M, Yoshiike N, Osaka T, Numba Y, Zimmet P, Inoue S. Criteria and  
407 classification of obesity in Japan and Asia-Oceania. *Asia Pacific J Clin Nutr*.  
408 2002;11(Suppl):S732–S737.
- 409 16. Biffi A, Cortellini L, Nearnberg CM, Ayres AM, Schwab K, Gilson AJ, Rost NS,  
410 Goldstein JN, Viswanathan A, Greenberg SM, et al. Body mass index and etiology of  
411 intracerebral hemorrhage. *Stroke*. 2011;42:2526–2530.
- 412 17. Jolink WMT, Wiegertjes K, Rinkel GJE, Algra A, de Leeuw FE, Klijn CJM. Author  
413 Response: Location-specific risk factors for intracerebral hemorrhage: systematic  
414 review and meta-analysis. *Neurology*. 2021;96:1011.
- 415 18. Delcourt C, Sato S, Zhang S, Sandset EC, Zheng D, Chen X, Hackett ML, Arima H,  
416 Hata J, Heeley E, et al. Intracerebral hemorrhage location and outcome among  
417 INTERACT2 participants. *Neurology*. 2017;88:1408–1414.
- 418 19. Arboix A, Comes E, García-Eroles L, Massons J, Oliveres M, Balcells M, Targa C. Site  
419 of bleeding and early outcome in primary intracerebral hemorrhage. *Acta Neurol Scand*.  
420 2002;105:282–288.
- 421 20. Nakai M, Iwanaga Y, Sumita Y, Wada S, Hiramatsu H, Iihara K, Kohro T, Komuro I,  
422 Kuroda T, Matoba T, et al. Associations among cardiovascular and cerebrovascular



- 423 diseases: Analysis of the nationwide claims-based JROAD-DPC dataset. *PLoS One*.  
424 2022;17:e0264390.
- 425 21. Rickham PP. Human Experimentation: Code of Ethics of W.M.A. *Br. Med. J.*  
426 1964;2:177.
- 427 22. Charlson ME, Pompei P, Ales KL, MacKenzie CR. A new method of classifying  
428 prognostic comorbidity in longitudinal studies: development and validation. *J Chronic*  
429 *Dis.* 1987;40:373–383.
- 430 23. Mahoney FI, Barthel DW. Functional evaluation: The Barthel index. *Md State Med J.*  
431 1965;14:61–65.
- 432 24. Rankin J. Cerebral vascular accidents in patients over the age of 60. II. Prognosis. *Scott*  
433 *Med. J.* 1957;2:200–215.
- 434 25. do Carmo JF, Morelato RL, Pereira H, de Oliveira ERA. Disability after stroke: a  
435 systematic review. *Fisioterapia em Movimento.* 2015;28:407–418.
- 436 26. Witsch J, Siegerink B, Nolte CH, Sprügel M, Steiner T, Endres M, Huttner HB.  
437 Prognostication after intracerebral hemorrhage: a review. *Neurol Res Pract.* 2021;3:22.
- 438 27. Tilson JK, Sullivan KJ, Cen SY, Rose DK, Koradia CH, Azen SP, Duncan PW;  
439 Locomotor Experience Applied Post Stroke (LEAPS) Investigative Team. Meaningful  
440 gait speed improvement during the first 60 days poststroke: minimal clinically  
441 important difference. *Phys Ther.* 2010;90:196–208.

- 442 28. Maestrini I, Rocchi L, Diana F, Requena Ruiz M, Elosua-Bayes I, Ribo M, Abdalkader  
443 M, Klein P, Gabrieli JD, Alexandre AM, et al. Outcomes and safety of endovascular  
444 treatment from 6 to 24 hours in patients with a pre-stroke moderate disability (mRS 3):  
445 a multicenter retrospective study. *J Neurointerv Surg.* 2024;jnis-2024-021634.
- 446 29. Zhang W, Coote S, Frost T, Dewey HM, Choi PMC. Acute stroke patients with mild-to-  
447 moderate pre-existing disability should be considered for thrombolysis treatment. *J*  
448 *Stroke Cerebrovasc Dis.* 2018;27:2707–2711.
- 449 30. R Core Team. R: A language and environment for statistical computing. R Foundation  
450 for Statistical Computing, <https://www.R-project.org/> (2023, accessed August 18,  
451 2023).
- 452 31. Itoh H, Kaneko H, Kiriyaama H, Kamon T, Fujiu K, Morita K, Yotsumoto H, Michihata  
453 N, Jo T, Takeda N, et al. Reverse J-shaped relationship between body mass index and  
454 in-hospital mortality of patients hospitalized for heart failure in Japan. *Heart Vessels.*  
455 2021;36:383–392.
- 456 32. Andaluz N, Zuccarello M. Recent trends in the treatment of spontaneous intracerebral  
457 hemorrhage: analysis of a nationwide inpatient database. *J Neurosurg.* 2009;110:403–  
458 410.
- 459 33. Miwa K, Nakai M, Yoshimura S, Sasahara Y, Wada S, Koge J, Ishigami A, Yagita Y,  
460 Kamiyama K, Miyamoto Y, et al. Clinical impact of body mass index on outcomes of

- 461 ischemic and hemorrhagic strokes. *Int J Stroke*. 2024;17474930241249370.
- 462 34. Quinn TJ, Taylor-Rowan M, Coyte A, Clark AB, Musgrave SD, Metcalf AK, Day DJ,  
463 Bachmann MO, Warburton EA, Potter JF, et al. Pre-stroke modified Rankin Scale:  
464 evaluation of validity, prognostic accuracy, and association with treatment. *Front*  
465 *Neurol*. 2017;8:275.
- 466 35. Hemphill JC 3rd, Farrant M, Neill TA Jr. Prospective validation of the ICH score for  
467 12-month functional outcome. *Neurology*. 2009;73:1088–1094.
- 468 36. Elagizi A, Kachur S, Lavie CJ, Carbone S, Pandey A, Ortega FB, Milani RV. An  
469 overview and update on obesity and the obesity paradox in cardiovascular diseases.  
470 *Prog Cardiovasc Dis*. 2018;61:142–150.
- 471 37. Doehner W, Clark A, Anker SD. The obesity paradox: weighing the benefit. *Eur Heart*  
472 *J*. 2010;31:146–148.
- 473 38. Jönsson AC, Lindgren I, Norrving B, Lindgren A. Weight loss after stroke. *Stroke*.  
474 2008;39:918–923.
- 475 39. Nakadate A, Otaka Y, Kondo K, Yamamoto R, Matsuura D, Honaga K, Muraoka K,  
476 Akaboshi K, Liu M. Age, body mass index, and white blood cell count predict the  
477 resumption of oral intake in subacute stroke patients. *J Stroke Cerebrovasc Dis*.  
478 2016;25:2801–2808.
- 479 40. Yoneda Y, Okuda S, Hamada R, Toyota A, Gotoh J, Watanabe M, Okada Y, Ikeda K,

- 480 Ibayashi S, Hasegawa Y. Hospital cost of ischemic stroke and intracerebral hemorrhage  
481 in Japanese stroke centers. *Health Policy*. 2005;73:202–211.
- 482 41. Langhorne P, Bernhardt J, Kwakkel G. Stroke rehabilitation. *Lancet*. 2011;377:1693–  
483 1702.

484 **Figure Legends**

485 **Figure 1. Flow of the present study.**

486 This flowchart depicts selection of the present study patients with ICH using the JROAD-  
487 DPC database. JROAD-DPC, Japanese Registry of All Cardiovascular Diseases Diagnosis  
488 Procedure Combination.

489

490 **Figure 2. BMI spline curve for intracerebral hemorrhage-related functional decline.**

491 This spline curve was created with body mass index on the x-axis and odds ratio of ICH-  
492 related functional decline on the y-axis. ICH, intracerebral hemorrhage.

493

494 **Figure 3. BMI spline curves for hospitalization cost.**

495 Spline curves were stratified by age under 75 (blue) or age 75 or over (red), with body mass  
496 index on the x-axis and hospitalization cost on the y-axis.

JROAD-DPC database: Hospitalization with intracerebral hemorrhage  
from April 2016 to March 2020 (**n = 222,318**)

Excluded:

Age < 20 years (n = 2,513)

Length of hospital stay < 3 days (n = 25,252)

No emergency admission (n = 8,526)

Hospitals with < 10 beds (n = 759)

Hospital death (n = 20,629)

No brain rehabilitation (n = 9,428)

Study population in 1,017 hospitals (**n = 155,211**)

Odds ratio of ICH-related functional decline

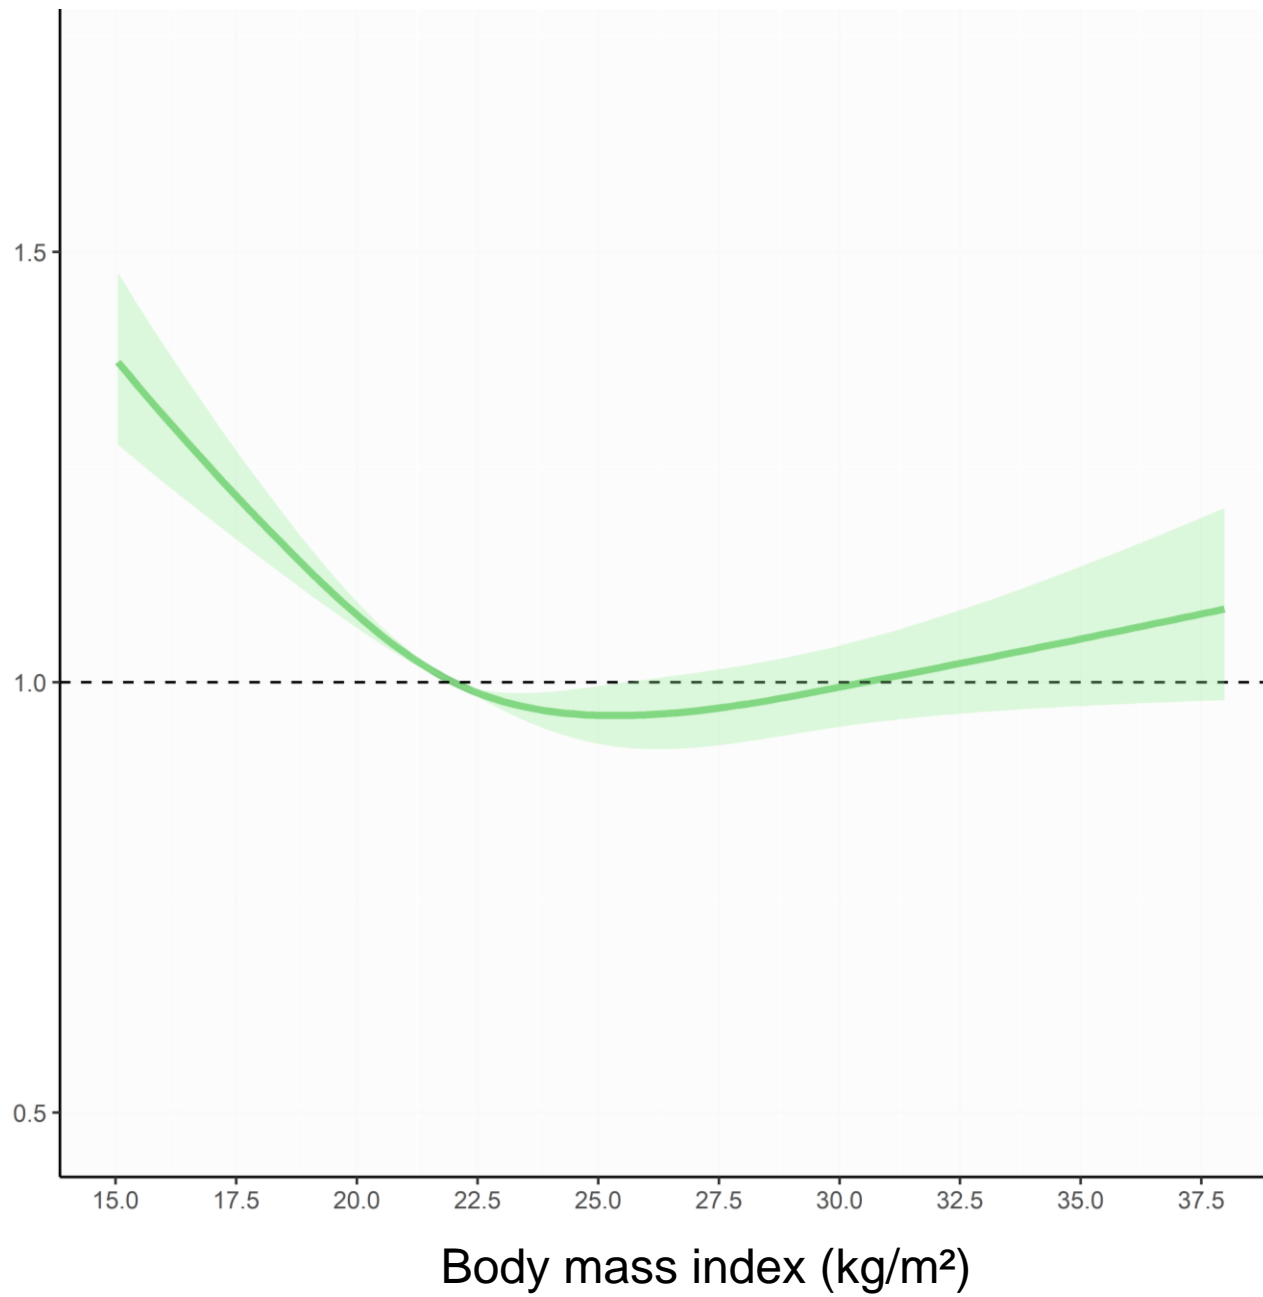

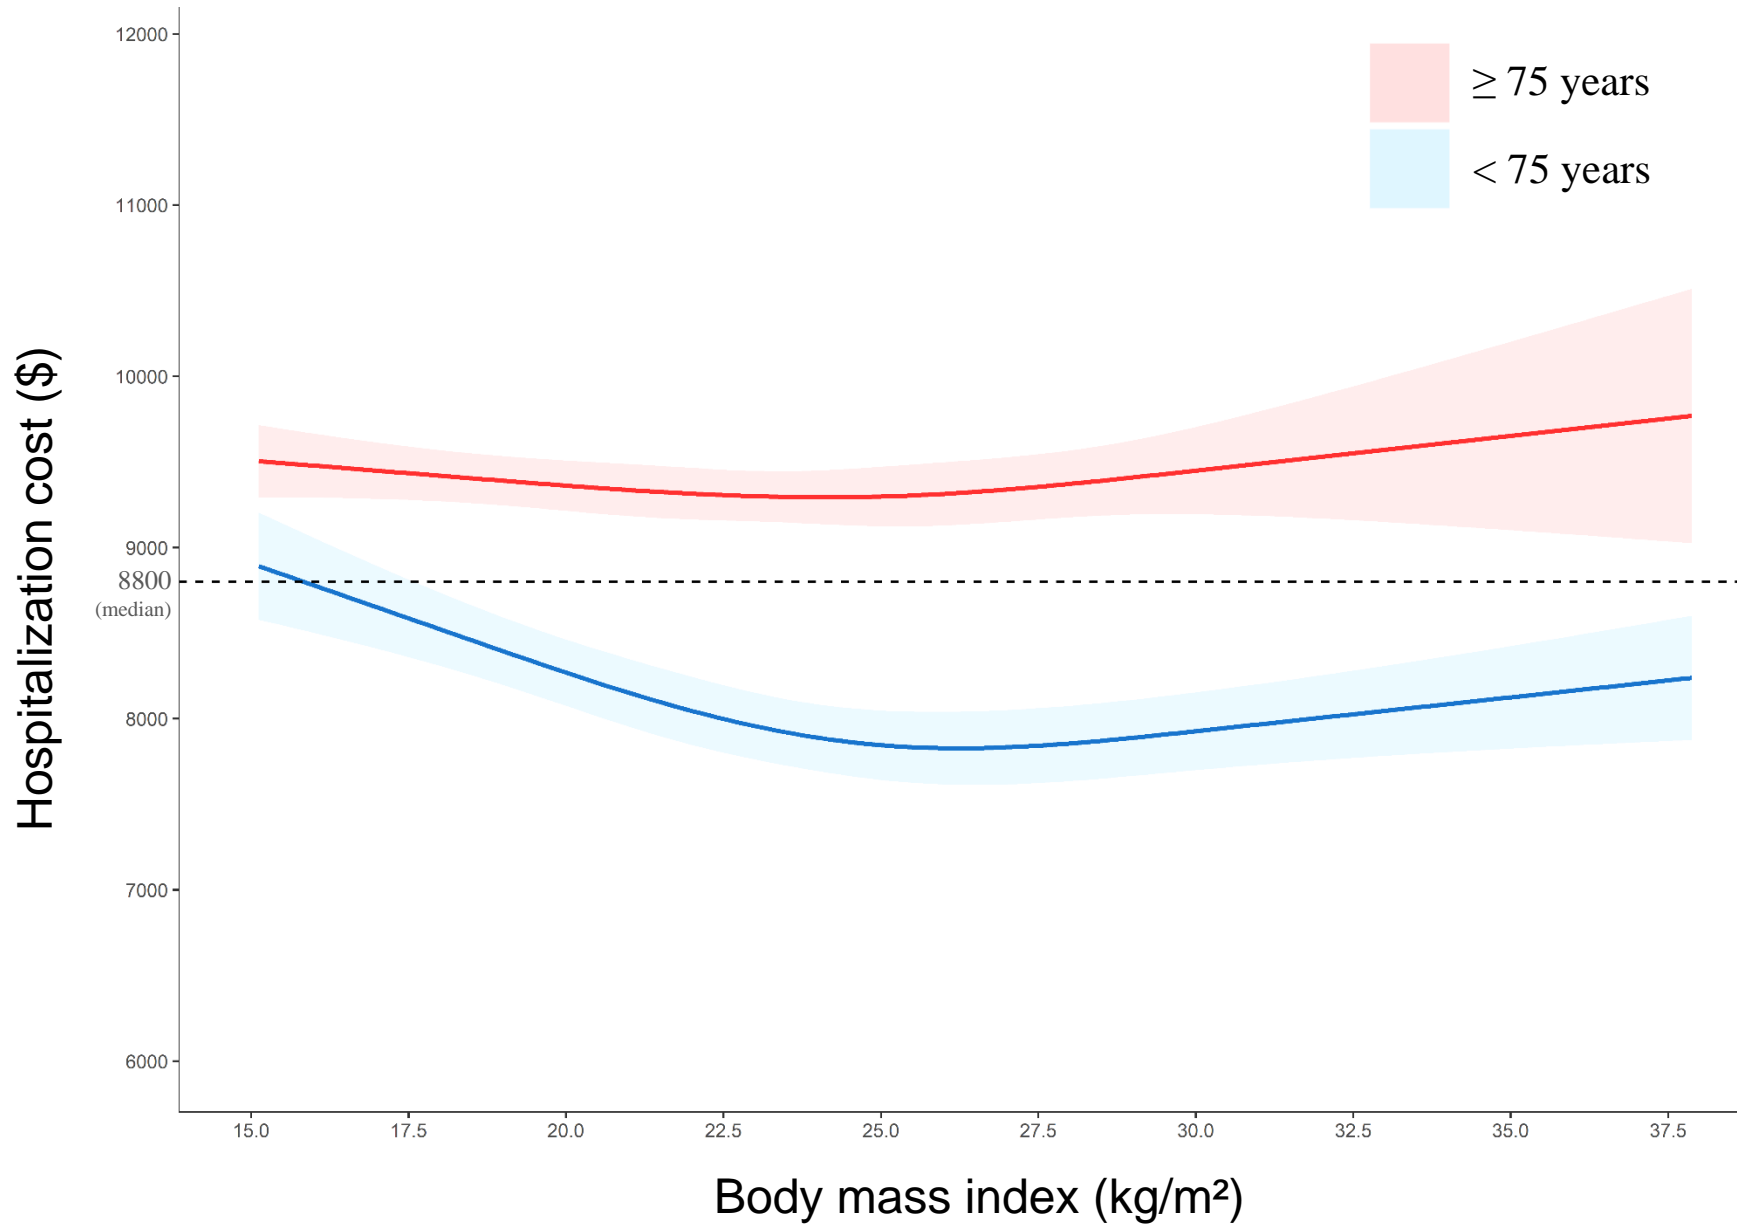

Source: https://medrxiv.org/content/10.1101/2024.07.01.24309789v1.full.pdf
